# Supplementary material for: Conserved roles of glucose in suppressing reactive oxygen species-induced cell death and animal survival
Source: publisher site journal article supplement (doi:10.18632/aging.102155), 2019-08-12
Supplement: Supplementary file [file aging-v11i15-102155-supplementary-material-SD3.pdf]

## SUPPLEMENTARY TABLES

**Supplementary Table 1. *C. elegans* strains used in this study.**

| Strain | Description                                                                       |
|--------|-----------------------------------------------------------------------------------|
| N2     | Wild-type strain originally isolated from mushroom compost near Bristol, England. |
| CF1903 | <i>glp-1(e2144)</i> III.                                                          |
| MQ887  | <i>isp-1(qm150)</i> IV.                                                           |
| CF2189 | <i>Is001</i> [Pskn-1::skn-1::GFP + rol-6(su1006)]                                 |
| CL2166 | <i>dvIs19</i> [pAF15( <i>gst-4</i> ::GFP::NLS)] III                               |
| CL2006 | <i>dvIs2</i> [pCL12( <i>unc-54</i> /human Abeta peptide 1-42 minigene) + pRF4]    |
| AM140  | <i>rmIs132</i> [unc-54p::Q35::YFP]                                                |

**Supplementary Table 2. Primer sets for RT-qPCR.**

| Gene          | Forward primer sequence (5'-3') | Reverse primer sequence (5'-3') | Ref. |
|---------------|---------------------------------|---------------------------------|------|
| <i>gst-4</i>  | CCCATTTTACAAGTCGATGG            | CTTCCTCTGCAGTTTTTCCA            | [3]  |
| <i>gst-5</i>  | GGTAAGAAGCTTGCTCAATC;           | AATGCTGGAAGGAAGATGTC            | [4]  |
| <i>gst-10</i> | GTCTACCACGTTTTGGATGC            | ACTTTGTCGGCCTTTCTCTT            | [3]  |
| <i>gcs-1</i>  | AATCGATTCTTTGGAGACC             | ATGTTTGCCTCGACAATGTT            | [3]  |
| <i>act-1</i>  | TCGGTATGGGACAGAAGGAC            | CATCCCAGTTGGTGACGATA            | [3]  |

**Supplementary Table 3. Lifespan data in 4A.**

| Experiment | Genotype            | Treatment | Death (censored) | Medium survival | P Values |
|------------|---------------------|-----------|------------------|-----------------|----------|
| 1          | N2 wild-type        | ctrl      | 88(12)           | 22              | <0.0001  |
|            | N2 wild-type        | glucose   | 67(27)           | 16              |          |
|            | <i>isp-1(qm150)</i> | ctrl      | 98(7)            | 28              |          |
|            | <i>isp-1(qm150)</i> | glucose   | 63(23)           | 16              |          |
| 2          | N2 wild-type        | ctrl      | 98(10)           | 24              | <0.0001  |
|            | N2 wild-type        | glucose   | 87(31)           | 17              |          |
|            | <i>isp-1(qm150)</i> | ctrl      | 93(14)           | 27              |          |
|            | <i>isp-1(qm150)</i> | glucose   | 82(36)           | 17              |          |

**Supplementary Table 4. Lifespan data in 4B.**

| Experiment | Genotype            | Treatment | Death (censored) | Medium survival | P Values |
|------------|---------------------|-----------|------------------|-----------------|----------|
| 1          | N2 wild-type        | ctrl      | 93(16)           | 24              | <0.0001  |
|            | N2 wild-type        | glucose   | 66(22)           | 16              |          |
|            | <i>glp-1(e2144)</i> | ctrl      | 99(14)           | 30              |          |
|            | <i>glp-1(e2144)</i> | glucose   | 61(35)           | 16              |          |
| 2          | N2 wild-type        | ctrl      | 78(30)           | 23              | <0.0001  |
|            | N2 wild-type        | glucose   | 57(44)           | 15              |          |
|            | <i>glp-1(e2144)</i> | ctrl      | 82(23)           | 29              |          |
|            | <i>glp-1(e2144)</i> | glucose   | 72(31)           | 17              |          |

**Supplementary Table 5. Lifespan data in 4C.**

| <b>Experiment</b> | <b>Genotype</b> | <b>Treatment</b> | <b>Death (censored)</b> | <b>Medium survival</b> | <b>P Values</b> |
|-------------------|-----------------|------------------|-------------------------|------------------------|-----------------|
| 1                 | N2 wild-type    | ctrl             | 93(14)                  | 21                     | <0.0001         |
|                   | N2 wild-type    | glucose          | 66(25)                  | 15                     |                 |
|                   | N2 wild-type    | PQ+ctrl          | 85(11)                  | 27                     | <0.0001         |
|                   | N2 wild-type    | PQ+glucose       | 69(27)                  | 15                     |                 |
| 2                 | N2 wild-type    | ctrl             | 85(16)                  | 22                     | <0.0001         |
|                   | N2 wild-type    | glucose          | 57(39)                  | 16                     |                 |
|                   | N2 wild-type    | PQ+ctrl          | 86(22)                  | 28                     | <0.0001         |
|                   | N2 wild-type    | PQ+glucose       | 64(40)                  | 16                     |                 |

PQ: paraquat (1mM), glucose
